# Supplementary material
Source: HighWire-hosted journal article supplement (doi:10.1101/rna.080307.124)
Supplement: Supplemental_Table_S1.xlsx [file Supplemental_Table_S1.xlsx]

## Sheet: Input ddCt
Input	rps-25					gld-1					mpk-1					htp-1					cpb-1					prom-1					fem-3					lin-45					fog-1					him-3
	Avg Ct					Avg Ct	ΔCt	ΔΔCt	2^-ΔΔCt		Avg Ct	ΔCt	ΔΔCt	2^-ΔΔCt		Avg Ct	ΔCt	ΔΔCt	2^-ΔΔCt		Avg Ct	ΔCt	ΔΔCt	2^-ΔΔCt		Avg Ct	ΔCt	ΔΔCt	2^-ΔΔCt		Avg Ct	ΔCt	ΔΔCt	2^-ΔΔCt		Avg Ct	ΔCt	ΔΔCt	2^-ΔΔCt		Avg Ct	ΔCt	ΔΔCt	2^-ΔΔCt		Avg Ct	ΔCt	ΔΔCt	2^-ΔΔCt
WT_1	10.83					10.89	0.06	-0.05	1.03526	1.01224	13.12	2.29	-0.0833333	1.05946	1.00197	14.37	3.54	-0.176667	1.13027	1.00899	17.2	6.37	0.0433333	0.97041	1.00055	16.13	5.3	0.0733333	0.950439	1.00386	18.44	7.61	-0.33	1.25701	1.01906	13.32	2.49	-0.126667	1.09177	1.01872	22.4	11.57	-0.153333	1.11214	1.01753	12.93	2.1	-0.196667	1.14605
WT_2	10.56					10.97	0.41	0.3	0.812252		13.06	2.5	0.126667	0.915945		14.55	3.99	0.273333	0.827406		16.91	6.35	0.0233333	0.983957		15.89	5.33	0.103333	0.93088		18.86	8.3	0.36	0.779165		13.57	3.01	0.393333	0.761368		22.67	12.11	0.386667	0.764895		13.39	2.83	0.533333	0.690956
WT_3	10.89					10.75	-0.14	-0.25	1.18921		13.22	2.33	-0.0433333	1.03049		14.51	3.62	-0.0966667	1.0693		17.15	6.26	-0.0666667	1.04729		15.94	5.05	-0.176667	1.13027		18.8	7.91	-0.03	1.02101		13.24	2.35	-0.266667	1.20303		22.38	11.49	-0.233333	1.17555		12.85	1.96	-0.336667	1.26284
AVG WT ΔCt							0.11					2.37333					3.71667					6.32667					5.22667					7.94					2.61667					11.7233					2.29667
Y479A_1	10.58					10.54	-0.04	-0.15	1.10957	1.03654	13.18	2.6	0.226667	0.854607	1.03883	14.4	3.82	0.103333	0.93088	1.04433	17.14	6.56	0.233333	0.850667	0.921972	15.99	5.41	0.183333	0.880666	0.961093	18.66	8.08	0.14	0.907519	1.13365	13.12	2.54	-0.0766667	1.05458	1.0819	22.42	11.84	0.116667	0.922316	1.11146	12.86	2.28	-0.0166667	1.01162
Y479A_2	10.65					10.77	0.12	0.01	0.993092		12.96	2.31	-0.0633333	1.04488		14.15	3.5	-0.216667	1.16205		17.09	6.44	0.113333	0.92445		15.85	5.2	-0.0266667	1.01866		18.37	7.72	-0.22	1.16473		13.13	2.48	-0.136667	1.09936		22.52	11.87	0.146667	0.903335		12.96	2.31	0.0133333	0.990801
Y479A_3	10.88					10.98	0.1	-0.01	1.00696		12.97	2.09	-0.283333	1.217		14.54	3.66	-0.0566667	1.04006		17.22	6.34	0.0133333	0.990801		16.13	5.25	0.0233333	0.983957		18.41	7.53	-0.41	1.32869		13.37	2.49	-0.126667	1.09177		22.01	11.13	-0.593333	1.50873		13.09	2.21	-0.0866667	1.06191
TRM7_1	10.88					10.88	0	-0.11	1.07923	1.06199	13.01	2.13	-0.243333	1.18372	1.03505	14.62	3.74	0.0233333	0.983957	1.10454	17.05	6.17	-0.156667	1.11471	1.03985	16.08	5.2	-0.0266667	1.01866	1.00582	18.81	7.93	-0.01	1.00696	1.06965	13.26	2.38	-0.236667	1.17827	1.07576	22.92	12.04	0.316667	0.802923	1.08126	13.18	2.3	0.00333333	0.997692
TRM7_2	10.82					10.86	0.04	-0.07	1.04972		13.1	2.28	-0.0933333	1.06683		14.22	3.4	-0.316667	1.24545		16.97	6.15	-0.176667	1.13027		15.84	5.02	-0.206667	1.15402		18.52	7.7	-0.24	1.18099		13.65	2.83	0.213333	0.862542		22.04	11.22	-0.503333	1.41748		12.79	1.97	-0.326667	1.25411
TRM7_3	10.76					10.79	0.03	-0.08	1.05702		13.36	2.6	0.226667	0.854607		14.36	3.6	-0.116667	1.08423		17.28	6.52	0.193333	0.874583		16.23	5.47	0.243333	0.844791		18.67	7.91	-0.03	1.02101		13.13	2.37	-0.246667	1.18646		22.45	11.69	-0.0333333	1.02337		13.06	2.3	0.00333333	0.997692
TRM7_Y479A_1	10.75					10.73	-0.02	-0.13	1.09429	1.05628	13.12	2.37	-0.00333333	1.00231	0.991612	14.38	3.63	-0.0866667	1.06191	1.08709	16.95	6.2	-0.126667	1.09177	1.02256	15.89	5.14	-0.0866667	1.06191	0.934329	18.68	7.93	-0.01	1.00696	1.10685	13.67	2.92	0.303333	0.810378	0.967768	22.17	11.42	-0.303333	1.23399	0.952288	13.19	2.44	0.143333	0.905425
TRM7_Y479A_2	10.66					10.63	-0.03	-0.14	1.10191		13.29	2.63	0.256667	0.83702		14.12	3.46	-0.256667	1.19472		17.14	6.48	0.153333	0.899171		16.25	5.59	0.363333	0.777366		18.37	7.71	-0.23	1.17283		13.38	2.72	0.103333	0.93088		22.66	12	0.276667	0.825496		13.09	2.43	0.133333	0.911722
TRM7_Y479A_3	10.71					10.86	0.15	0.04	0.972655		12.9	2.19	-0.183333	1.1355		14.42	3.71	-0.00666667	1.00463		16.93	6.22	-0.106667	1.07674		15.99	5.28	0.0533333	0.963707		18.46	7.75	-0.19	1.14076		13.11	2.4	-0.216667	1.16205		22.76	12.05	0.326667	0.797377		13.02	2.31	0.0133333	0.990801
GFP_1	10.51					10.66	0.15	0.04	0.972655	1.01419	12.92	2.41	0.0366667	0.974905	0.993755	14.2	3.69	-0.0266667	1.01866	1.01843	16.85	6.34	0.0133333	0.990801	0.972551	15.81	5.3	0.0733333	0.950439	0.977154	18.46	7.95	0.01	0.993092	0.943987	13.07	2.56	-0.0566667	1.04006	0.96549	22.77	12.26	0.536667	0.689362	0.970255	12.74	2.23	-0.0666667	1.04729
GFP_2	10.56					10.74	0.18	0.07	0.952638		12.87	2.31	-0.0633333	1.04488		14.47	3.91	0.193333	0.874583		16.83	6.27	-0.0566667	1.04006		15.92	5.36	0.133333	0.911722		18.73	8.17	0.23	0.852635		13.42	2.86	0.243333	0.844791		22.34	11.78	0.0566667	0.961483		13.15	2.59	0.293333	0.816014
GFP_3	10.66					10.61	-0.05	-0.16	1.11729		13.09	2.43	0.0566667	0.961483		14.16	3.5	-0.216667	1.16205		17.16	6.5	0.173333	0.886791		15.79	5.13	-0.0966667	1.0693		18.62	7.96	0.02	0.986233		13.26	2.6	-0.0166667	1.01162		22.05	11.39	-0.333333	1.25992		12.96	2.3	0.00333333	0.997692
[truncated: 51 more columns]

## Sheet: IP ddCt
IP	rps-25					gld-1					mpk-1					htp-1					cpb-1					prom-1					fem-3					lin-45					fog-1					him-3
	Avg Ct					Avg Ct	ΔCt	ΔΔCt	2^-ΔΔCt		Avg Ct	ΔCt	ΔΔCt	2^-ΔΔCt		Avg Ct	ΔCt	ΔΔCt	2^-ΔΔCt		Avg Ct	ΔCt	ΔΔCt	2^-ΔΔCt		Avg Ct	ΔCt	ΔΔCt	2^-ΔΔCt		Avg Ct	ΔCt	ΔΔCt	2^-ΔΔCt		Avg Ct	ΔCt	ΔΔCt	2^-ΔΔCt		Avg Ct	ΔCt	ΔΔCt	2^-ΔΔCt		Avg Ct	ΔCt	ΔΔCt	2^-ΔΔCt
WT_1	34.46					15.85	-18.61	-0.0666667	1.04729	1.03693	22.54	-11.92	0.18	0.882703	1.0052	18.72	-15.74	0.05	0.965936	1.03431	22.01	-12.45	0.156667	0.897095	1.03366	23.45	-11.01	-0.19	1.14076	1.07193	25.16	-9.3	-0.403333	1.32256	1.07055	22.77	-11.69	-0.06	1.04247	1.03691	24.62	-9.84	-0.586667	1.50177	1.06672	19.91	-14.55	0.2	0.870551
WT_2	34.2					15.21	-18.99	-0.446667	1.36289		22.1	-12.1	0	1		17.93	-16.27	-0.48	1.39474		21.94	-12.26	0.346667	0.786399		24.14	-10.06	0.76	0.590496		26.1	-8.1	0.796667	0.575678		23.08	-11.12	0.51	0.702222		25.65	-8.55	0.703333	0.614152		18.9	-15.3	-0.55	1.46409
WT_3	34.26					16.23	-18.03	0.513333	0.700602		21.98	-12.28	-0.18	1.13288		18.9	-15.36	0.43	0.742262		21.15	-13.11	-0.503333	1.41748		22.87	-11.39	-0.57	1.48452		24.97	-9.29	-0.393333	1.31342		22.18	-12.08	-0.45	1.36604		24.89	-9.37	-0.116667	1.08423		19.86	-14.4	0.35	0.784584
AVG WT ΔCt							-18.5433					-12.1					-15.79					-12.6067					-10.82					-8.89667					-11.63					-9.25333					-14.75
Y479A_1	34.31					17.61	-16.7	1.84333	0.278677	0.347035	23.48	-10.83	1.27	0.41466	0.574751	18.92	-15.39	0.4	0.757858	0.74121	22.01	-12.3	0.306667	0.808508	0.532623	24.87	-9.44	1.38	0.384219	0.575715	25.66	-8.65	0.246667	0.842842	0.77128	22.62	-11.69	-0.06	1.04247	0.850253	24.98	-9.33	-0.0766667	1.05458	1.08556	19.67	-14.64	0.11	0.926588
Y479A_2	34.13					16.54	-17.59	0.953333	0.516438		22.99	-11.14	0.96	0.514057		19.36	-14.77	1.02	0.493116		22.9	-11.23	1.37667	0.385108		25.08	-9.05	1.77	0.293209		25.78	-8.35	0.546667	0.6846		23.58	-10.55	1.08	0.473029		24.66	-9.47	-0.216667	1.16205		18.97	-15.16	-0.41	1.32869
Y479A_3	34.86					18.34	-16.52	2.02333	0.245989		23.09	-11.77	0.33	0.795536		19.11	-15.75	0.04	0.972655		23.56	-11.3	1.30667	0.404254		23.97	-10.89	-0.07	1.04972		26.31	-8.55	0.346667	0.786399		23.18	-11.68	-0.05	1.03526		25.55	-9.31	-0.0566667	1.04006		20.11	-14.75	0	1
TRM7_1	34.41					33.45	-0.96	17.5833	5.09201e-06	1.20617e-05	32.33	-2.08	10.02	0.000963118	0.000546958	38.44	4.03	19.82	1.0804e-06	1.93466e-05	38.4	3.99	16.5967	1.00903e-05	0.000136735	34.87	0.46	11.28	0.000402144	0.000271039	34.12	-0.29	8.60667	0.00256528	0.00144824	35.47	1.06	12.69	0.000151332	0.000685344	36.66	2.25	11.5033	0.00034447	0.00141121	35.06	0.65	15.4	2.3128e-05
TRM7_2	34.77					32.68	-2.09	16.4533	1.11443e-05		34.54	-0.23	11.87	0.000267162		34.56	-0.21	15.58	2.04152e-05		33.89	-0.88	11.7267	0.000295068		36.92	2.15	12.97	0.000124635		35.52	0.75	9.64667	0.00124757		32.59	-2.18	9.45	0.00142977		34.25	-0.52	8.73333	0.00234966		34.81	0.04	14.79	3.52993e-05
TRM7_3	34.8					31.87	-2.93	15.6133	1.99489e-05		33.95	-0.85	11.25	0.000410594		33.75	-1.05	14.74	3.65441e-05		35.41	0.61	13.2167	0.000105048		35.75	0.95	11.77	0.000286337		36.78	1.98	10.8767	0.00053186		34.21	-0.59	11.04	0.000474929		34.89	0.09	9.34333	0.00153949		36.92	2.12	16.87	8.3488e-06
TRM7_Y479A_1	34.63					34.45	-0.18	18.3633	2.96542e-06	3.8855e-06	36.51	1.88	13.98	6.18872e-05	0.000253508	36.24	1.61	17.4	5.782e-06	1.31916e-05	35.28	0.65	13.2567	0.000102175	0.000426685	33.15	-1.48	9.34	0.00154305	0.000784254	37.54	2.91	11.8067	0.000279151	0.00132887	38.75	4.12	15.75	1.81459e-05	0.000588432	35.57	0.94	10.1933	0.000854085	0.00104945	35.21	0.58	15.33	2.42778e-05
TRM7_Y479A_2	34.35					33.98	-0.37	18.1733	3.38284e-06		33.93	-0.42	11.68	0.000304768		36.69	2.34	18.13	3.48599e-06		34.84	0.49	13.0967	0.000114159		34.5	0.15	10.97	0.000498541		33.95	-0.4	8.49667	0.00276853		33.54	-0.81	10.82	0.000553166		34.42	0.07	9.32333	0.00156098		37.08	2.73	17.48	5.47011e-06
TRM7_Y479A_3	34.88					33.86	-1.02	17.5233	5.30825e-06		34.09	-0.79	11.31	0.000393868		34.1	-0.78	15.01	3.03068e-05		32.15	-2.73	9.87667	0.00106372		35.71	0.83	11.65	0.000311172		36.04	1.16	10.0567	0.000938948		32.96	-1.92	9.71	0.00119398		36.04	1.16	10.4133	0.000733288		35.77	0.89	15.64	1.95835e-05
GFP_1	34.36					37.44	3.08	21.6233	3.09548e-07	7.11405e-06	37.02	2.66	14.76	3.6041e-05	0.000168734	30.94	-3.42	12.37	0.000188912	6.88027e-05	33.57	-0.79	11.8167	0.000277223	0.00011156	36.75	2.39	13.21	0.000105534	0.000300659	35.95	1.59	10.4867	0.000696945	0.000410648	34.48	0.12	11.75	0.000290334	0.000146266	32.97	-1.39	7.86333	0.00429438	0.00267962	34.77	0.41	15.16	2.7314e-05
GFP_2	34.64					35.21	0.57	19.1133	1.76325e-06		33.69	-0.95	11.15	0.000440064		35.42	0.78	16.57	1.02786e-05		36.51	1.87	14.4767	4.38621e-05		34.23	-0.41	10.41	0.000734984		38.23	3.59	12.4867	0.000174236		36.28	1.64	13.27	0.000101235		36.45	1.81	11.0633	0.00046731		38.2	3.56	18.31	3.07709e-06
GFP_3	34.88					32	-2.88	15.6633	1.92693e-05		37.8	2.92	15.02	3.00974e-05		36.17	1.29	17.08	7.21785e-06		38.44	3.56	16.1667	1.3594e-05		38.05	3.17	13.99	6.14597e-05		37.42	2.54	11.4367	0.000360762		37.62	2.74	14.37	4.72279e-05		33.88	-1	8.25333	0.00327717		35.12	0.24	14.99	3.07298e-05
[truncated: 51 more columns]
