# Supplementary material
Source: HighWire-hosted journal article supplement (doi:10.1101/rna.080307.124)
Supplement: Supplemental_Table_S2.docx [file Supplemental_Table_S2.docx]

**Table S2 – Strains used in this study**

| Strains | Genotype | Simplified nomenclature | Reference |
| --- | --- | --- | --- |
| N2 | Wild type | Wild-type | Brenner 1974 |
| JK3022 | *fbf-1(ok91) II* | *fbf-1(ø)* | Crittenden et al. 2002 |
| JK3101 | *fbf-2(q738) II* | *fbf-2(ø)* | Lamont et al. 2004 |
| JK3107 | *fbf-1(ok91) fbf-2(q704) / mIn1[mIs14 dpy-10(e128)] II* | *fbf-1(ø) fbf-2(ø)* | Crittenden et al. 2002 |
| JK5081 | *qSi100 III; unc-119(ed3)* | eGFP3xFLAG, PGL-1 RGG repeat3xmyc | This study |
| JK5810 | *fbf-2(q945) II* | FBF-23xFLAG | Ferdous et al. 2023 |
| JK5984 | *fbf-2(q1011) II* | FBF-2(Y479A)3xFLAG | Carrick et al. 2024 |
| JK5986 | *fbf-1(ok91) fbf-2(q1023) / mIn1[mIs14 dpy-10(e128)] II* | *fbf-1(ø)* FBF-2(Y479A)3xFLAG | Carrick et al. 2024 |
| JK6578 | *fbf-1(ok91) fbf-2(q1261) / mIn1[mIs14 dpy-10(e128)] II* | *fbf-1(ø)* FBF-2(S453A, H454A, E457A)3xFLAG aka TRM7mut | This study |
| JK6593 | *fbf-2(q1262) II* | FBF-2(S453A, H454A, E457A)3xFLAG aka TRM7mut | This study |
| JK6596 | *fbf-1(ok91) fbf-2(q1272) / mIn1[mIs14 dpy-10(e128)] II* | *fbf-1(ø)* FBF-2(S453A, H454A, E457A, Y479A)3xFLAG aka TRM7mut Y479A | This study |
| JK6658 | *fbf-1(ok91) fbf-2(q1285) / mIn1[mIs14 dpy-10(e128)] II* | *fbf-1(ø)* FBF-2(N415A, Y416A, Q419A, S453A, H454A, E457A)3xFLAG aka TRM6mut TRM7mut | This study |
| JK6737 | *fbf-2(q1295) II* | FBF-2(S453A, H454A, E457A, Y479A)3xFLAG aka TRM7mut Y479A | This study |
