# Supplementary material
Source: HighWire-hosted journal article supplement (doi:10.1101/rna.080307.124)
Supplement: Supplemental_Table_S3.docx [file Supplemental_Table_S3.docx]

**Table S3 – CRISPR-Cas9 gene editing reagents**

| Description | Allele(s) | Guide RNA sequence (5' - 3') | DNA repair oligo sequence (5' - 3')  (uppercase denotes mutation) |
| --- | --- | --- | --- |
| FBF-2 (S453A, H454A, E457A) | *q1261*  *q1262*  *q1272*  *q1295* | gaagttccaatggtgcatgt | aggcgcaaccttctttcgttgtcccaggaaaagtttgctGCAGCTgttgttGCTaaagcattTctacatgcaccattggaacttcttgcc |
| FBF-2 (N415A, Y416A, Q419A) | *q1285* | aatatgctgtattatgtaat | gactaatcggtgccaagaattagctacgaacgagtatgccGCTGCTataataGCTcatattgtatccaatgatgatctggccgtttatcgggaat |
