# Supplementary material
Source: HighWire-hosted journal article supplement (doi:10.1101/rna.080307.124)
Supplement: Supplemental_Table_S4.docx [file Supplemental_Table_S4.docx]

**Table S4 – qPCR primers**

| Name | Sequence (5' - 3') | Use |
| --- | --- | --- |
| BHC87 | CGATCTTGAGCCCCACTCTC | *gld-1* qPCR forward |
| BHC88 | TGTTGGGTACTTCGGGAACG | *gld-1* qPCR reverse |
| BHC93 | AGTAGACCACCCAGTCGGTT | *fem-3* qPCR forward |
| BHC94 | GCACGGAATTTGACATTTCTTTTTA | *fem-3* qPCR reverse |
| BHC105 | GCAACATCTACACCGCCGA | *fog-1* qPCR forward |
| BHC106 | TCCGCGAGAATTCGGCTT | *fog-1* qPCR reverse |
| BHC117 | CGCAAAGCGTGTGTCTTCAA | *him-3* qPCR forward |
| BHC118 | CGCAAAGCGTGTGTCTTCAA | *him-3* qPCR reverse |
| BHC123 | CCCAAGATGACCGGAGAGTC | *syp-2* qPCR forward |
| BHC124 | TTCGATTTCTTCGGCGTGGA | *syp-2* qPCR reverse |
| BHC129 | ACATCACTGAAAAGCTGAAATGC | *htp-1* qPCR forward |
| BHC130 | TGGCTTCAAGATCTCCTTCATT | *htp-1* qPCR reverse |
| BHC159 | GATACCTAACTGGCACTACGGA | *rps-25* qPCR forward |
| BHC160 | TGAGGTGGGAGTCATTGACCTA | *rps-25* qPCR reverse |
| BHC165 | CACTTTGCTCACTCCGTAGC | *eft-3* qPCR forward |
| BHC166 | TACCCATCTCCTGAGCCTCC | *eft-3* qPCR reverse |
| BHC171 | GTTCACTGCTATGTTCCGCC | *tbb-2* qPCR forward |
| BHC172 | GCTTCTCCCTCAGCGTATCC | *tbb-2* qPCR reverse |
| BHC189 | AAGTTGGAGGTCGGCCTTTT | *pcn-1* qPCR forward |
| BHC190 | GATGATCGAGTCGCCTTCGT | *pcn-1* qPCR reverse |
| BHC195 | ACCACGAAAAATGCCGTTGG | *cyb-2.1* qPCR forward |
| BHC196 | AGCCAGTCAACAAGGATGCG | *cyb-2.1* qPCR reverse |
| BHC201 | GAACAGGAACAAGCGAGGGA | *wago-4* qPCR forward |
| BHC202 | GACTTGCCAAATCGGGCTTG | *wago-4* qPCR reverse |
| BHC207 | ACATTCTCCCTTCCCCTCCA | *daz-1* qPCR forward |
| BHC208 | GTGCGAGCTCCTTTGATTGG | *daz-1* qPCR reverse |
| BHC212 | AGAAGCAAAATCCAAGACTTGCC | *csr-1* qPCR forward |
| BHC213 | CACGTCCTCTGGCACTCATT | *csr-1* qPCR reverse |
| BHC224 | AAAAAGGAAGCGGTTCACGC | *cpb-1* qPCR forward |
| BHC225 | ACTGCTTTGTCGGTCATCGT | *cpb-1* qPCR reverse |
| BHC230 | CGAACTGCGTGAACGTCTTC | *cye-1* qPCR forward |
| BHC231 | TGCAGCTGGACCTTCCTTAG | *cye-1* qPCR reverse |
| BHC241 | CGTGAGGTGCCTGACGATAA | *prom-1* qPCR forward |
| BHC242 | GGCGATTTGTGAACGCATGA | *prom-1* qPCR reverse |
| BHC247 | TCGGAAGAACTGGAAGAGTTGG | *glh-1* qPCR forward |
| BHC248 | ACACTGGACCCAAATCCACT | *glh-1* qPCR reverse |
| BHC253 | CCGCCGAATGAGTCGGATTA | *lin-45* qPCR forward |
| BHC254 | GCGAAGCTTGATCCTTCCGA | *lin-45* qPCR reverse |
| BHC265 | TAAACCACCATCGAACGGGC | *mpk-1* qPCR forward |
| BHC266 | TCCGTCGGCCATCTTTCTATG | *mpk-1* qPCR reverse |
